# Supplementary material for: Carbon nanotube bridges fabricated by laser comb
Source: Royal Society of Chemistry journal article supplement (doi:10.1039/c9nr00590k), 2019-01-01
Supplement: c9nr00590k1.pdf [file c9nr00590k1.pdf]

## Electronic supplementary information

### **Carbon-nanotube bridge fabricated by laser comb**

Lei Wang,<sup>†, ‡, ⊥</sup> Xiannian Chi,<sup>†, ‡, ⊥</sup> Lianfeng Sun,<sup>\*, †, ‡</sup> and Qian Liu,<sup>\*, †, ‡, §</sup>

<sup>†</sup> Chinese Academy of Sciences (CAS) Center for Excellence in Nanoscience, CAS Key Laboratory of Nanosystem and Hierarchical Fabrication, National Center for Nanoscience and Technology, Beijing 100190, China.

<sup>‡</sup> University of Chinese Academy of Sciences, Beijing 10080, China.

<sup>§</sup> The MOE Key Laboratory of Weak-Light Nonlinear Photonics and TEDA Applied Physics Institute and School of Physics, Nankai University, Tianjin 300457, China.

<sup>⊥</sup> Lei Wang and Xiannian Chi contributed equally.

E-mail: liuq@nanoctr.cn; slf@nanoctr.cn

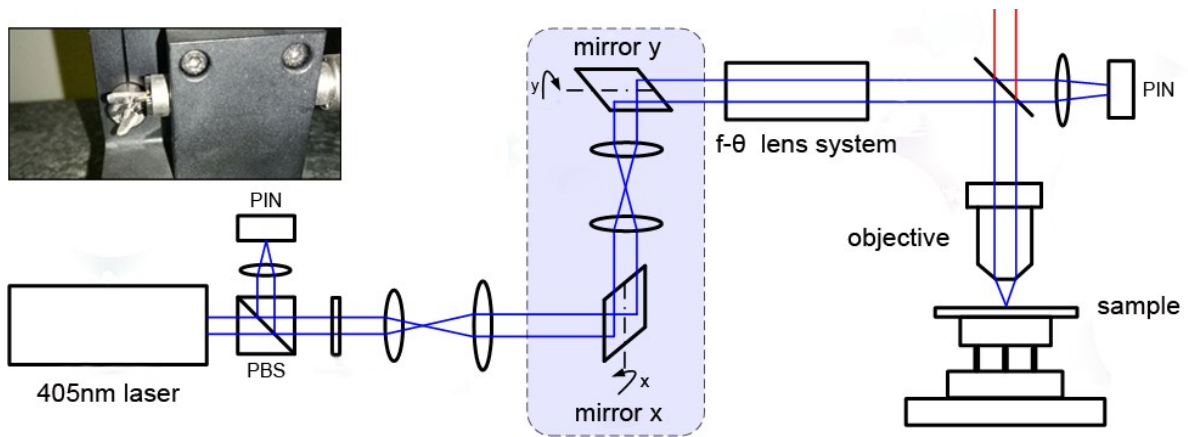

**Fig. S1** Main optical system to carry out the Laco method. The inset at the top left is the real photo of two vibrating mirrors (X and Y).

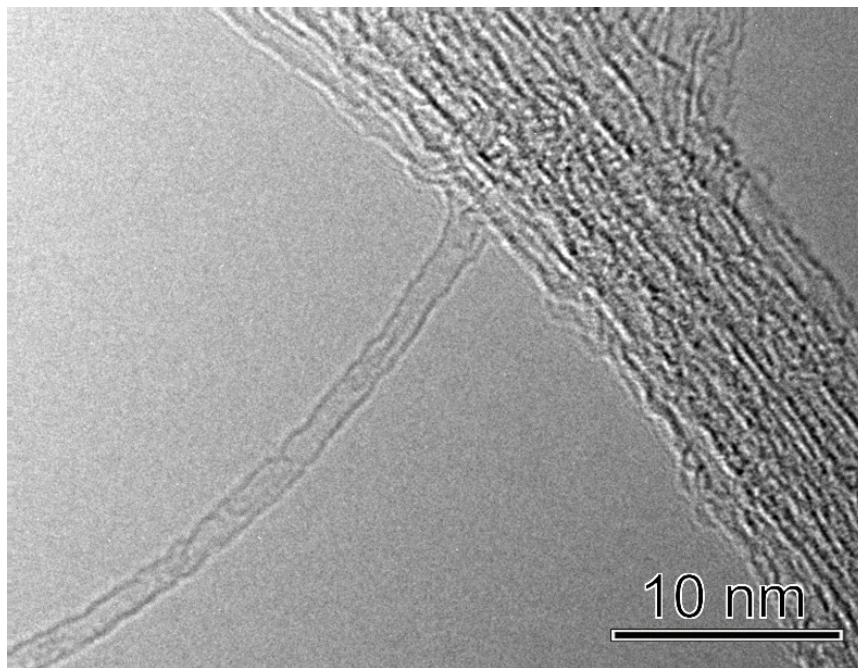

**Fig. S2** TEM image of the single-walled carbon nanotubes (SWNTs) grown by chemical vapor deposition (CVD)

As shown in the left of Fig. S2, a individual carbon nanotube displays a typical single-walled feature and the diameter of this individual nanotube is about 1.5 nm. As shown in the right of Fig. S2, individual SWNTs can also aggregate into bundles.

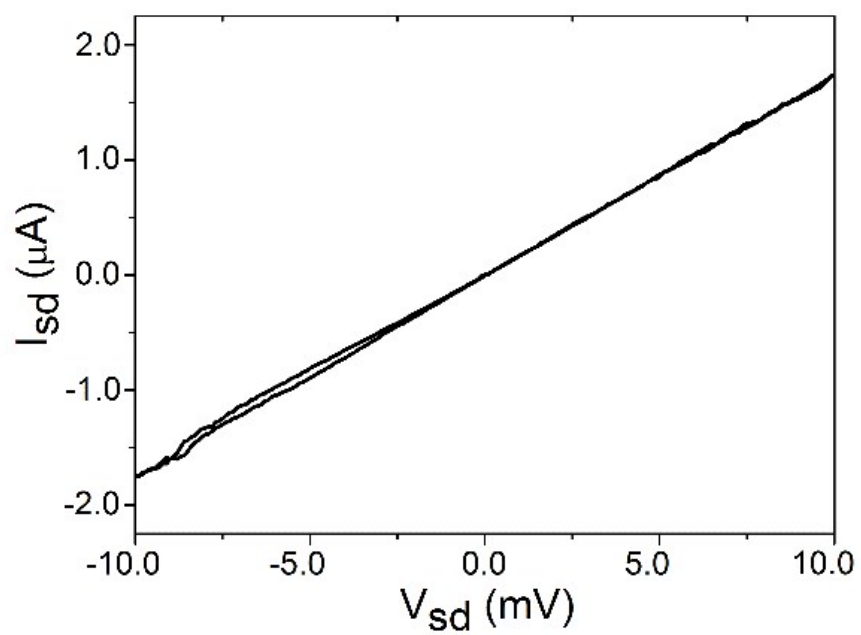

**Fig. S3** Typical two-terminal current-voltage characteristic of the connected CNTs network.

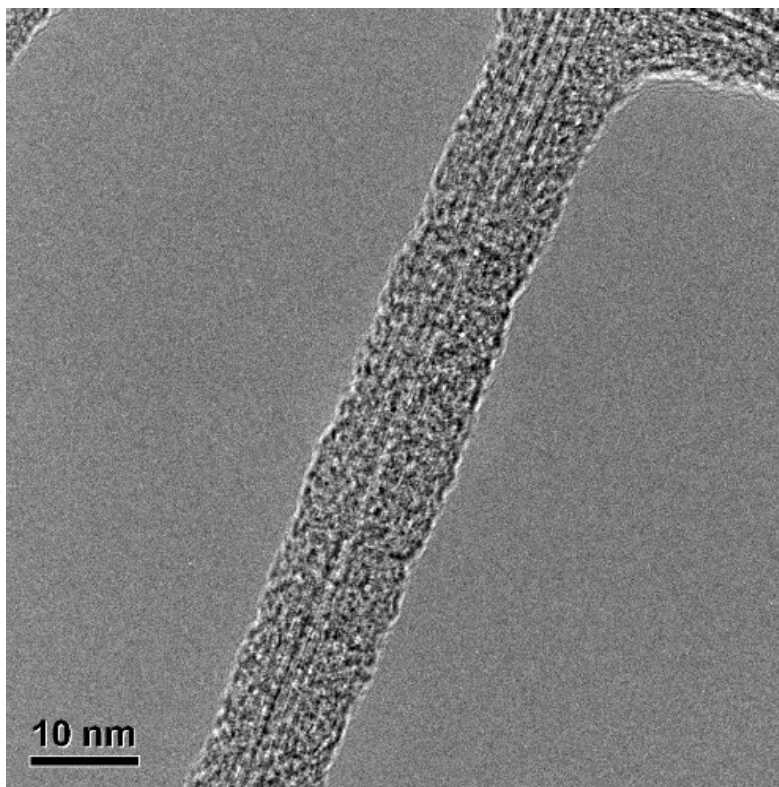

**Fig. S4** TEM image of the single-walled carbon nanotubes (SWNTs) after laser direct writing

**Table S1.** Material properties used in the numerical simulation.

| Material properties                                                                        | Value             |
|--------------------------------------------------------------------------------------------|-------------------|
| Density of carbon nanotube ( $\text{kg}\cdot\text{m}^{-3}$ )                               | 1350 <sup>1</sup> |
| Density of $\text{SiO}_2$ ( $\text{kg}\cdot\text{m}^{-3}$ )                                | 2200 <sup>2</sup> |
| Density of Si ( $\text{kg}\cdot\text{m}^{-3}$ )                                            | 2330 <sup>3</sup> |
| Thermal conductivity of carbon nanotube ( $\text{W}\cdot\text{m}^{-1}\cdot\text{K}^{-1}$ ) | 3500 <sup>4</sup> |
| Thermal conductivity of $\text{SiO}_2$ ( $\text{W}\cdot\text{m}^{-1}\cdot\text{K}^{-1}$ )  | 1.4 <sup>2</sup>  |
| Thermal conductivity of Si ( $\text{W}\cdot\text{m}^{-1}\cdot\text{K}^{-1}$ )              | 148 <sup>5</sup>  |
| Specific heat of carbon nanotube ( $\text{J}\cdot\text{kg}^{-1}\cdot\text{K}^{-1}$ )       | 78.3 <sup>1</sup> |
| Specific heat of $\text{SiO}_2$ ( $\text{J}\cdot\text{kg}^{-1}\cdot\text{K}^{-1}$ )        | 937 <sup>2</sup>  |
| Specific heat of Si ( $\text{J}\cdot\text{kg}^{-1}\cdot\text{K}^{-1}$ )                    | 705 <sup>5</sup>  |

## REFERENCES

1. T. Nakamiya, T. Ueda, T. Ikegami, K. Ebihara and R. Tsuda, *Current Applied Physics*, 2008, **8**, 400-403.
2. N. Dong and L. Kondic, *Physical Review Fluids*, 2016, **1**.
3. Z. Li, H. Zhang, Z. Shen and X. Ni, *Journal of Applied Physics*, 2013, **114**.
4. E. Pop, D. Mann, Q. Wang, K. E. Goodson and H. J. Dai, *Nano Letters*, 2006, **6**, 96-100.
5. T.-Y. Yang, I.-M. Park, H.-Y. You, S.-H. Oh, K.-W. Yi and Y.-C. Joo, *Journal of the Electrochemical Society*, 2009, **156**, H617-H620.
